# Supplementary material for: The Ocean’s Pharmacy: Health Discoveries in Marine Algae
Source: MDPI journal article supplement (doi:10.3390/molecules29081900), 2024-04-22
Supplement: s1 [file s1]

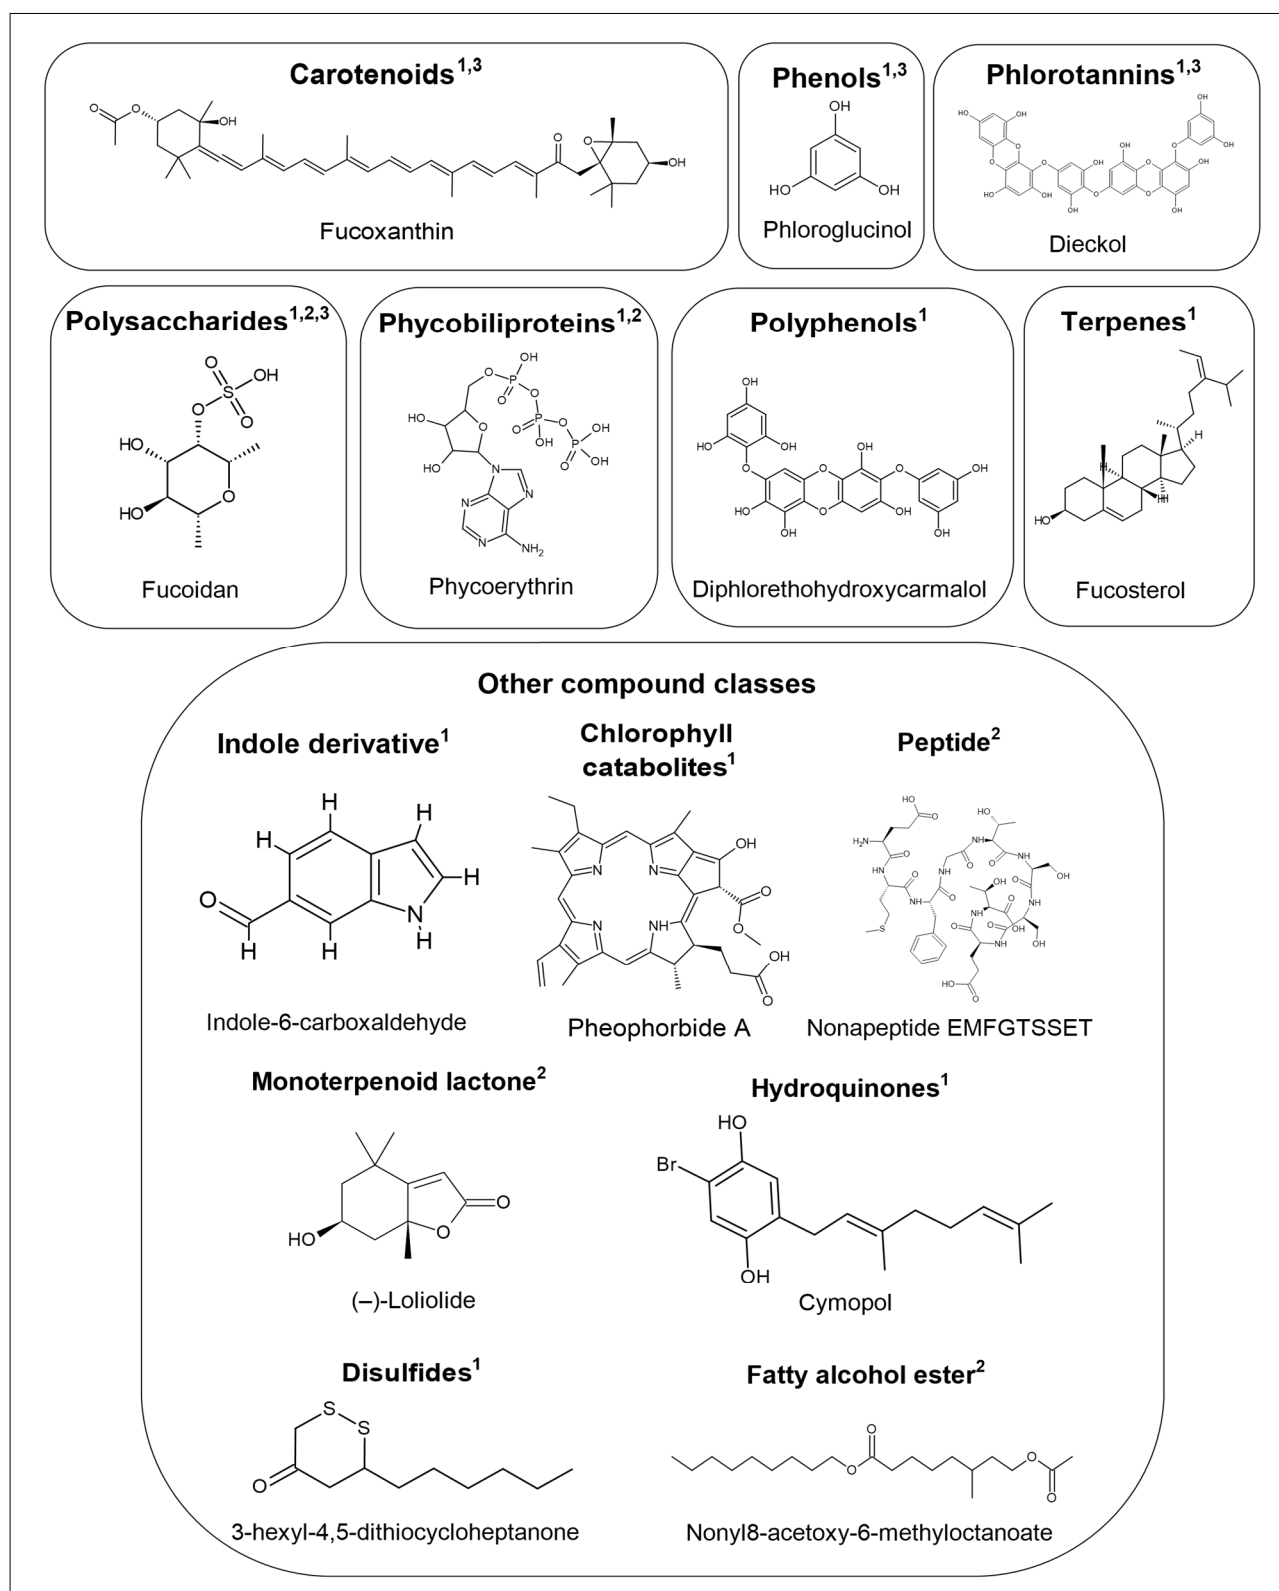

**Figure S1.** Chemical classification of isolated algal compounds used in cell and *in vivo* studies. Isolated compounds studied were classifiable in 7 categories: polysaccharides (n=37), phlorotannins (n=15), terpenes (n=12), carotenoids (n=6), polyphenols (n=4), phenols (n=3) and other compound classes (indole derivatives, chlorophyll catabolites, peptide, monoterpenoid lactone, hydroquinones, disulfides and fatty alcohol ester with n=1 each). The depicted compounds represent the most prevalent in each chemical class, based on the findings from the included cell and *in vivo* studies in this review. Superscript numbers (1,2 and 3) refer to the source of the isolated compounds: (1) macroalgal, (2) microalgal or (3) not-defined algae origin, respectively.
